# Supplementary material
Source: PubMed Central journal article supplement (PMC5105912)

# Supplemental Figure 1

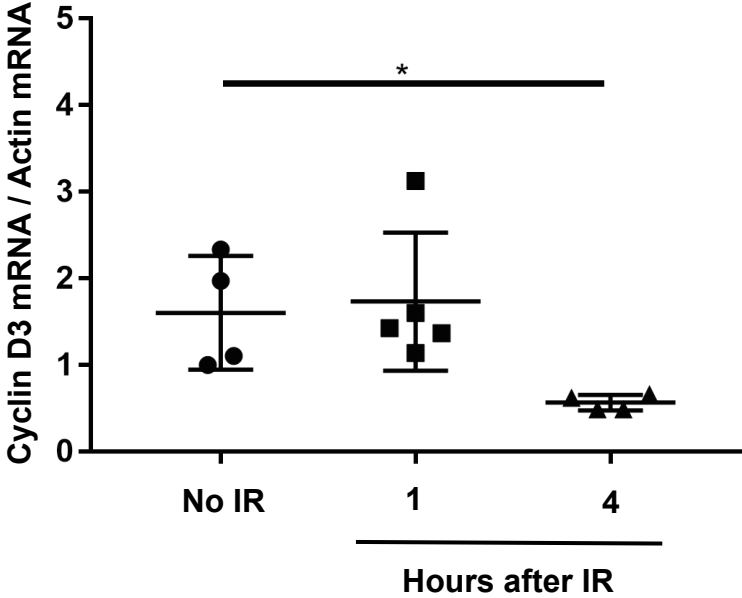

Supplement: kccy-15-21-1198861-s001.pdf [file kccy-15-21-1198861-s001.pdf]
